# Supplementary material for: Mucoadhesive Rifampicin-Liposomes for the Treatment of Pulmonary Infection by Mycobacterium abscessus: Chitosan or ε-Poly-L-Lysine Decoration
Source: MDPI journal article supplement (doi:10.3390/biom13060924), 2023-05-31
Supplement: s1 [file s1]

# Mucoadhesive Rifampicin-Liposomes for the Treatment of Pulmonary Infection by *Mycobacterium abscessus*: Chitosan or $\epsilon$ -poly-L-lysine Decoration

## 1. DLS: size distribution analysis

Dynamic Light Scattering (DLS) was used to determine the size distribution of the liposomal formulations by considering the intensity-weighted NNLS algorithm to analyze data [1.]

**Figure S1.** Intensity-weighted size distribution of bare liposomes and polyion-decorated liposomal formulations obtained by NNLS analysis.

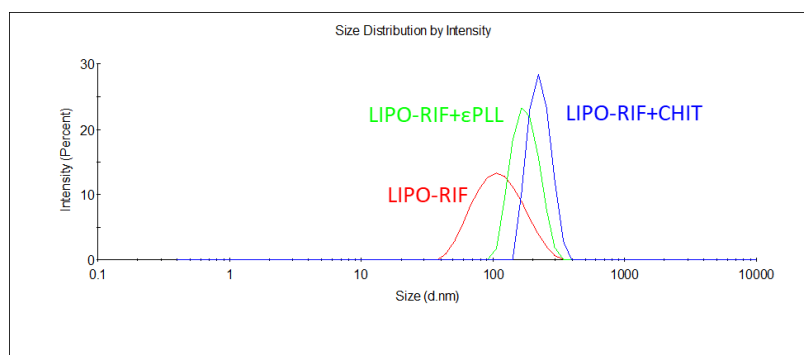

**Table S1.** Hydrodynamic diameter of bare liposomes and polyion-decorated liposomal formulations obtained by NNLS analysis. Errors are the standard deviations (SD) of data.

| Sample                    | $D_H \pm SD$<br>(nm) | width $\pm SD$<br>(nm) |
|---------------------------|----------------------|------------------------|
| LipoRIF                   | $118 \pm 4$          | $49 \pm 4$             |
| LipoRIF + Chit            | $228 \pm 8$          | $43 \pm 2$             |
| LipoRIF + $\epsilon$ -PLL | $179 \pm 5$          | $41 \pm 3$             |

1. Lawson, C. L., & Hanson, R. J. (1974). Solving Least Squares Problems, Prentice-Hall, Inc., Englewood Cliffs.
